# Supplementary material
Source: publisher figshare collection journal article supplement (https://acs.figshare.com/ndownloader/files/14077796)
Supplement: Supplementary file 1 [file 14077796]

# Promotion of Mefenamic acid Nucleation by a Surfactant Additive, Docusate Sodium

*Katalin Bodnár, Sarah P. Hudson, Åke C. Rasmuson\**

Synthesis and Solid State Pharmaceutical Centre, Department of Chemical Sciences, Bernal  
Institute, University of Limerick, Limerick V94 T9PX, Ireland

\* E-mail: [Ake.Rasmuson@ul.ie](mailto:Ake.Rasmuson@ul.ie)

## SUPPORTING INFORMATION

### Mole fraction solubility ratio of polymorphs in different solvents

Representing the free energy difference of a molecule in the solid phases at a certain temperature ( $\Delta G^{I-II}$ ), the mole fraction solubility ratio  $x_A^{II}/x_A^I$  is almost independent of the choice of solvent “A”, providing that the concentration dependence of the activity coefficient ( $\gamma_A(x)$ ) can be neglected for dilute solutions and thus the ratio of the activity coefficients can be assumed to be 1<sup>1,2</sup>:

$$\Delta G^{II \rightarrow I} = -kT \ln \left( \frac{a^{II}}{a^I} \right) = -kT \ln \left( \frac{x_A^{II} \cdot \gamma_A(x)}{x_A^I \cdot \gamma_A(x)} \right) \cong -kT \ln \left( \frac{x_A^{II}}{x_A^I} \right) \quad (\text{eq. S1})$$

Where  $a^{II}$  and  $a^I$  are the activities of the molecules in the solid phases of Form II and Form I.

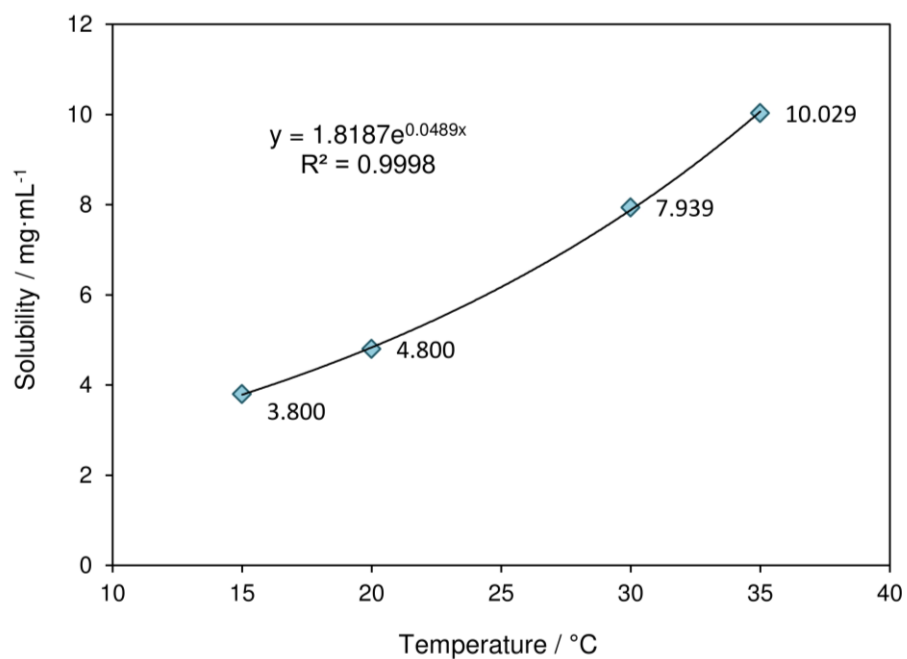

Figure S1 Solubility of MEF Form I in 70 % DMA – 30 % water at 15 °C, 20 °C, 30 °C and 35 °C in the absence of DOSS. An exponential fit to the solubility data is also presented.

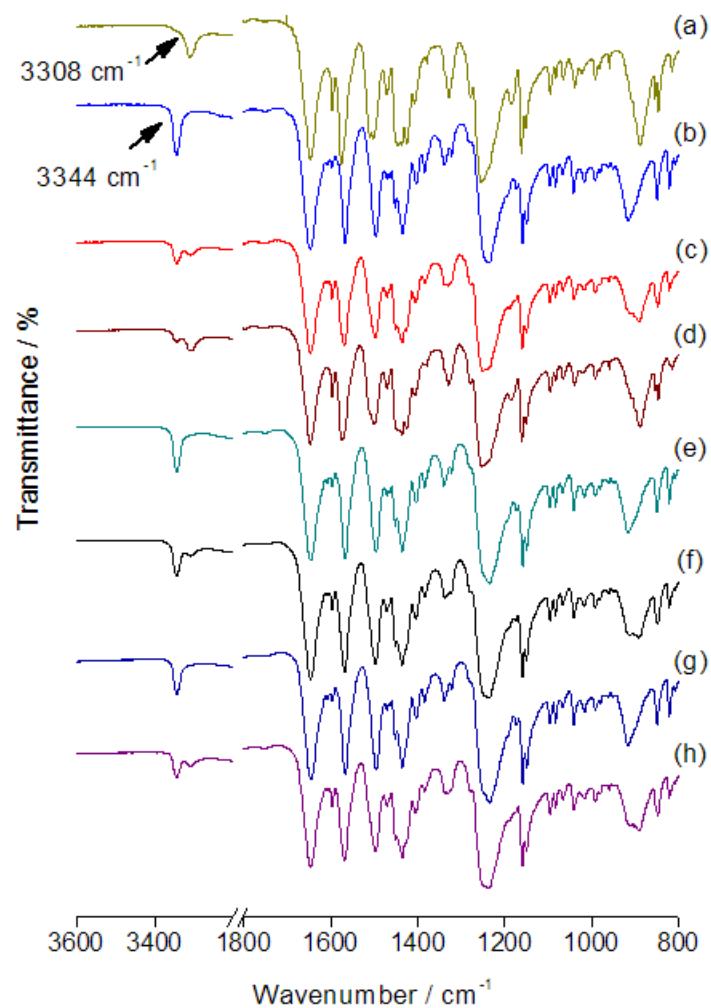

Figure S2 IR spectra of MEF polymorphs: (a) pure Form I, (b) pure Form II; spectra of particles prepared at  $S^{\text{II}}=4.40$  (c-d) without DOSS, (e-f) with 0.1 mg/mL DOSS, (g-h) with 0.2 mg/mL DOSS.

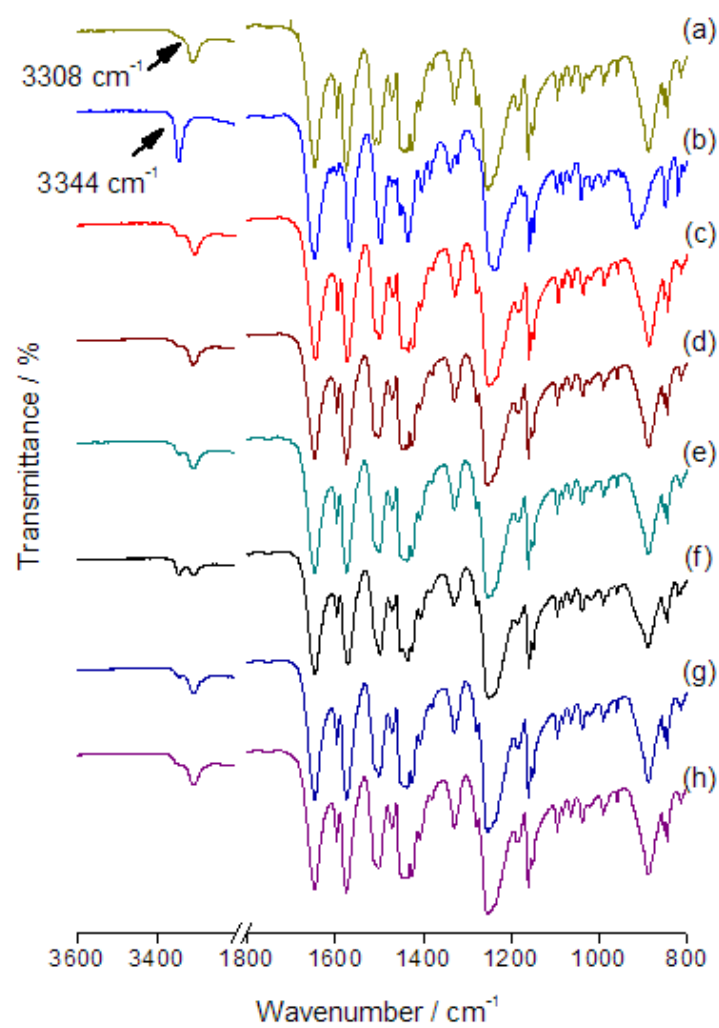

Figure S3 IR spectra of MEF polymorphs: (a) pure Form I, (b) pure Form II; spectra of particles prepared at  $S^{\text{II}}=2.20$  (c-d) without DOSS, (e-f) with 0.1 mg/mL DOSS, (g-h) with 0.2 mg/mL DOSS. All samples except (d) contained Form II crystals.

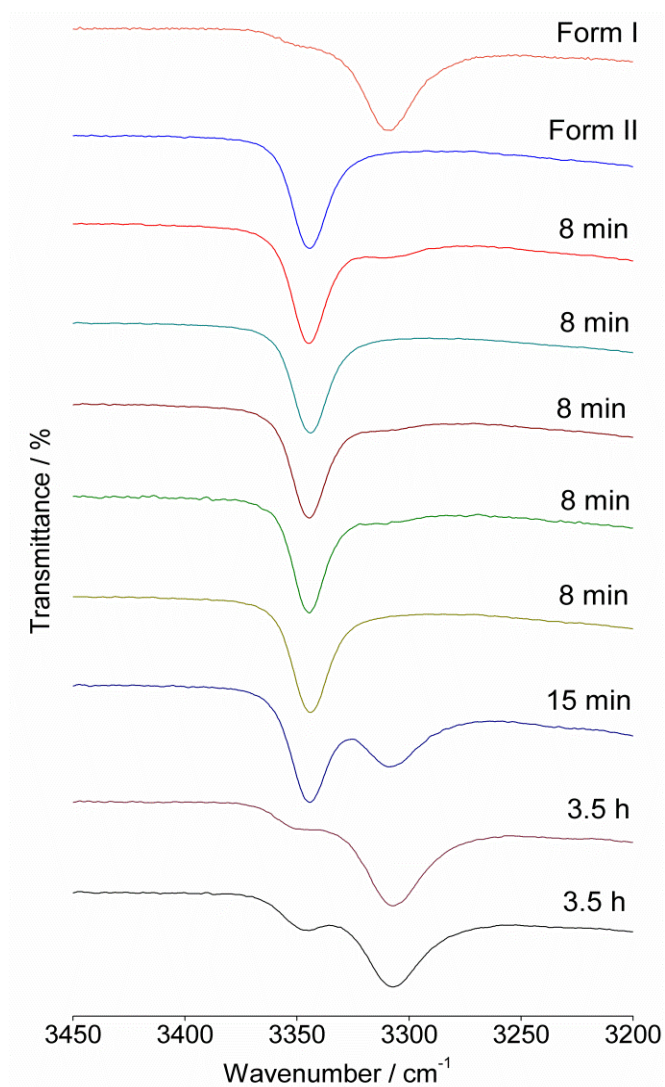

Figure S4 IR spectra of pure MEF polymorphs and MEF crystals nucleated at  $S^{\text{II}}=4.40$  in the absence of DOSS, isolated at different times after the detection of crystallization and dried under high vacuum at room temperature.  $S^{\text{II}}$  is calculated based on the solubility of the nucleating Form II crystals.

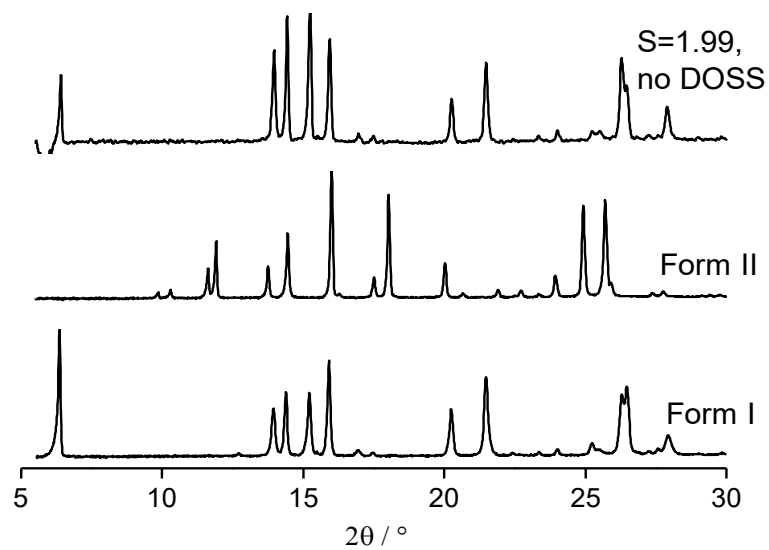

Figure S5 PXRD diffractogram of pure MEF polymorphs and MEF crystals nucleated in 70 % DMA – 30 % water at  $S^I=1.99$  in the absence of DOSS. Crystals were isolated at 8 min aging time.

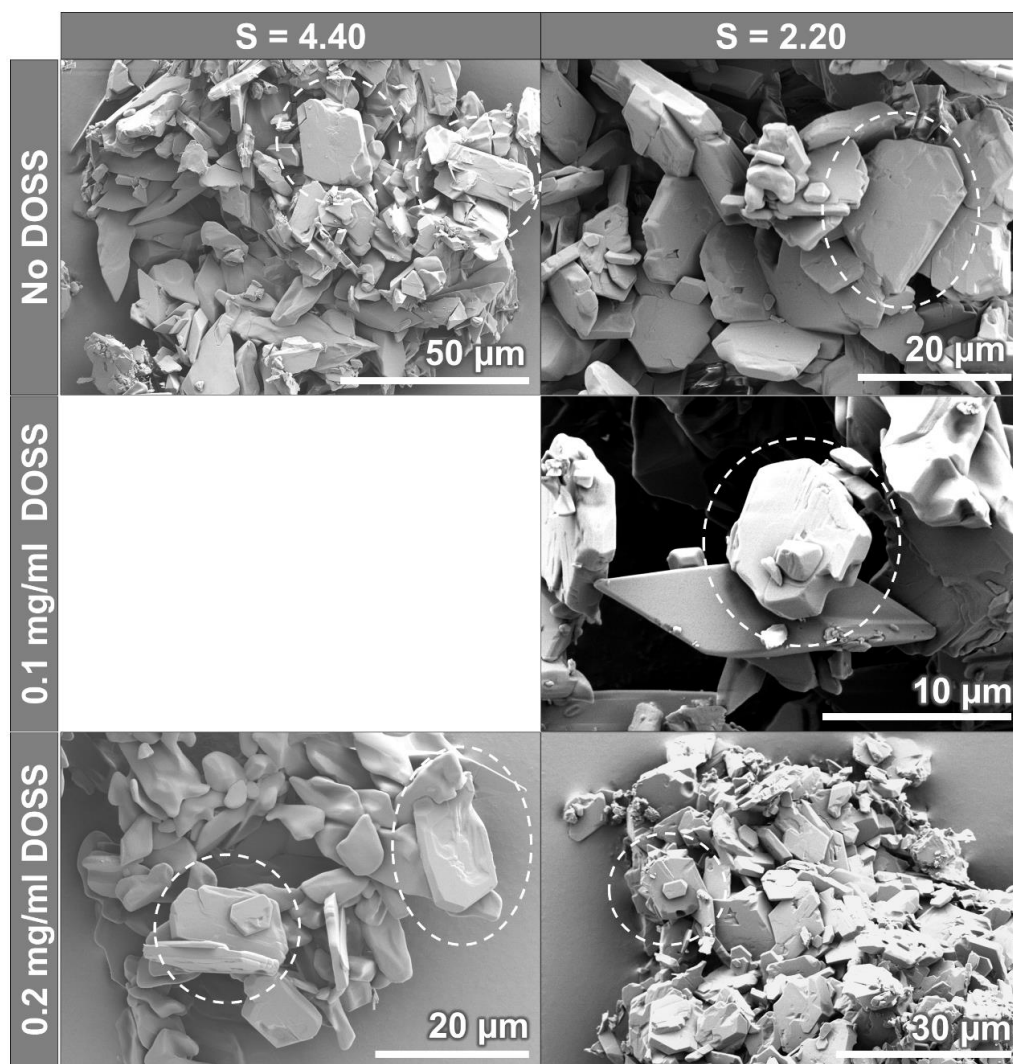

Figure S6 SEM images of MEF crystals prepared in the absence or presence of DOSS in 40 % DMA – 60 % water, at the highest ( $S^{\text{II}}=4.40$ , isolated at 8 min) and lowest ( $S^{\text{II}}=2.20$ , isolated at 15 min) employed supersaturation. Based on IR, samples are a mixture of Form I and Form II crystals, except at  $S^{\text{II}}=4.40$ , 0.1 mg/mL DOSS, with the images showing examples of Form I crystals (circled).

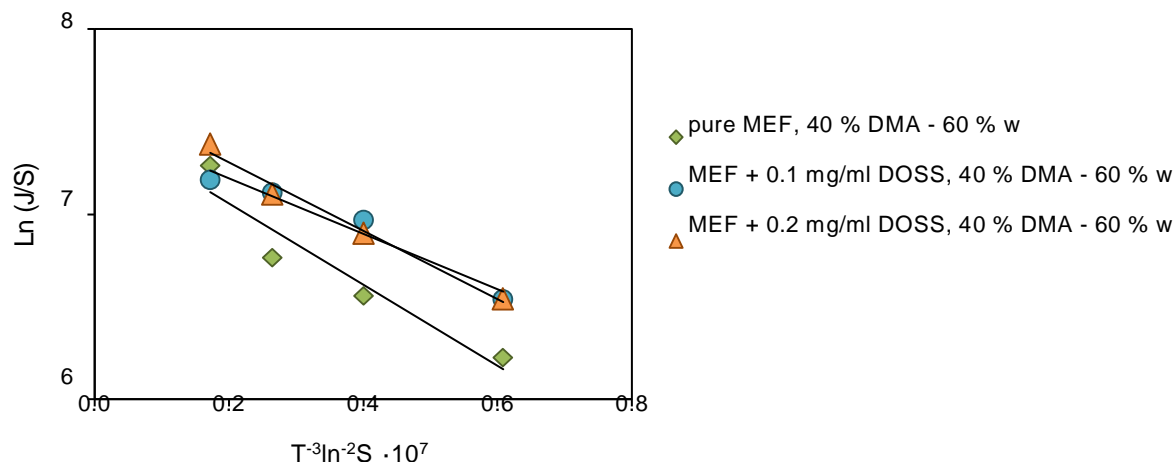

Figure S7 Plot of  $\ln(J/S)$  versus  $T^{-3} \ln^2 S$  for the determination of the pre-exponential factor  $A$  and interfacial energy  $\gamma$  of the nucleation from fitting to equation (8), including  $S^{\text{II}}=4.40-2.20$  in the linear fit in 40 % DMA – 60 % water.

#### Critical micelle concentration (CMC)

Conductometry was used for determination of CMC of DOSS in deionized water and in 40 % DMA – 60 % water at 25 °C. The conductivity of DOSS solutions at different concentrations were measured using a Malvern Zetasizer Nano ZSP and a folded capillary cell (cell type: DTS1070). Prior the measurement, the temperature of the solutions was equilibrated for 10 min at 25 °C. The conductivity was measured using three sub-runs and the average was reported as the result. Shown on Figure S8, in pure water, the critical micelle concentration (CMC) of DOSS was 7.8 mM = 3.5 mg/mL. In 40 % DMA – 60 % water, micelles were not detected up to 25 mM = 11.1 mg/mL DOSS, above which the standard deviation of the conductivity values increased significantly, restricting further collection of reliable data points. This means that micelle formation is not expected at 0.2 mg/mL DOSS in 40 % DMA – 60 % water, and on the basis that the CMC of a surfactant generally increases with increasing fraction of organic solvent in a water



– organic solvent mixture<sup>3,4,5</sup>, it is also not expected in 70 % DMA – 30 % water even at 5 mg/mL DOSS.

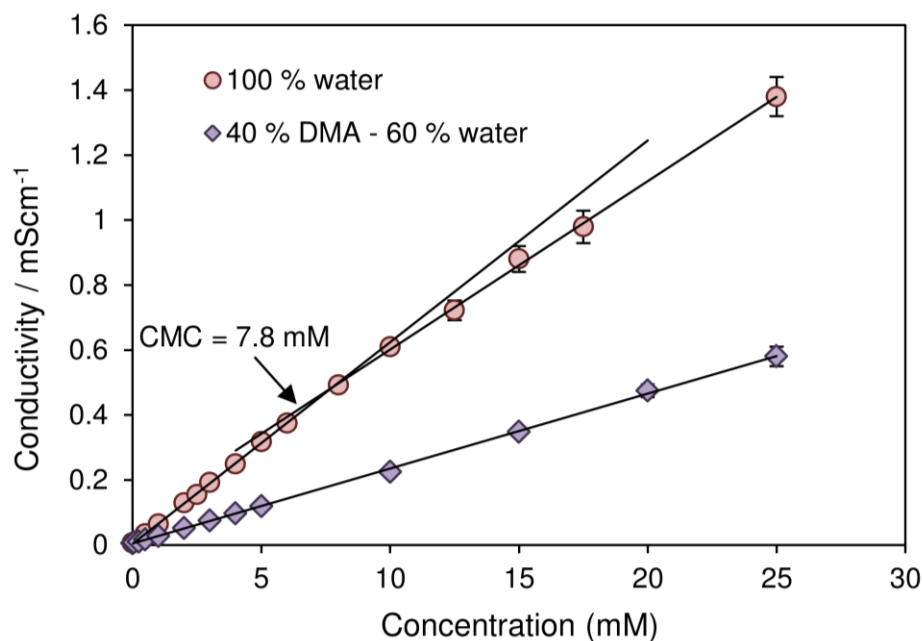

Figure S8 Conductivity of DOSS solutions at 25 °C. The critical micelle concentration (CMC) of DOSS in water is shown as the intercept of the two trendlines.

## References

- (1) Threlfall, T. Crystallization of polymorphs: Thermodynamic insight into the role of solvent. *Org. Process Res. Dev.* **2000**, *4*, 384–390.
- (2) Harry G. Brittain in *Polymorphism in pharmaceutical solids*; Informa Healthcare USA: New York, 2009; pp 1-23.
- (3) Das, S.; Mondal, S.; Ghosh, S. Physicochemical studies on the micellization of cationic, anionic, and nonionic surfactants in water-polar organic solvent mixtures. *J. Chem. Eng. Data* **2013**, *58*, 2586–2595.
- (4) Das, S.; Naskar, B.; Ghosh, S. Influence of temperature and polar organic solvents

(isopropanol and 1,4-dioxane) on the micellization of cationic gemini surfactant (14-4-14).

*Soft Matter* **2014**, *10*, 2863–2875.

- (5) Nagarajan, R.; Wang, C.-C. Theory of surfactant aggregation in water/ethylene glycol mixed solvents. *Langmuir* **2000**, *16*, 5242–5251.
